# Supplementary material for: One Side of the Story; Clues to Etiology in Patients with Asymmetric Chorea
Source: PubMed Central journal article supplement (PMC8815437; doi:10.5334/tohm.675), 2022-01-31

Supplemental Figure 1: Results of literature search.

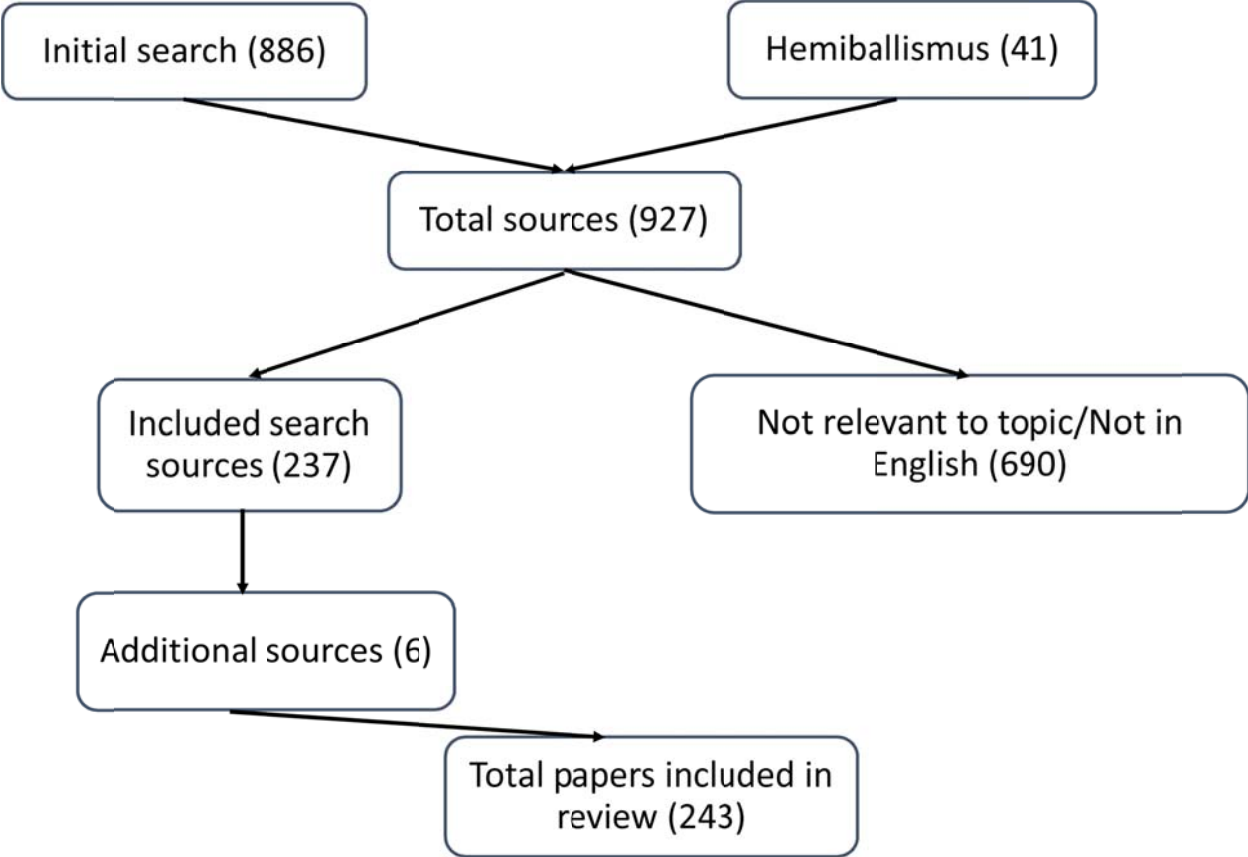

Supplement: tohm-12-1-675-s1.pdf [file tohm-12-1-675-s1.pdf]
