# Supplementary material for: One Side of the Story; Clues to Etiology in Patients with Asymmetric Chorea
Source: PubMed Central journal article supplement (PMC8815437; doi:10.5334/tohm.675), 2022-01-31
Supplement: tohm-12-1-675-s2.pdf [file tohm-12-1-675-s2.pdf]

Supplemental Figure 2: Number of papers by diagnosis.

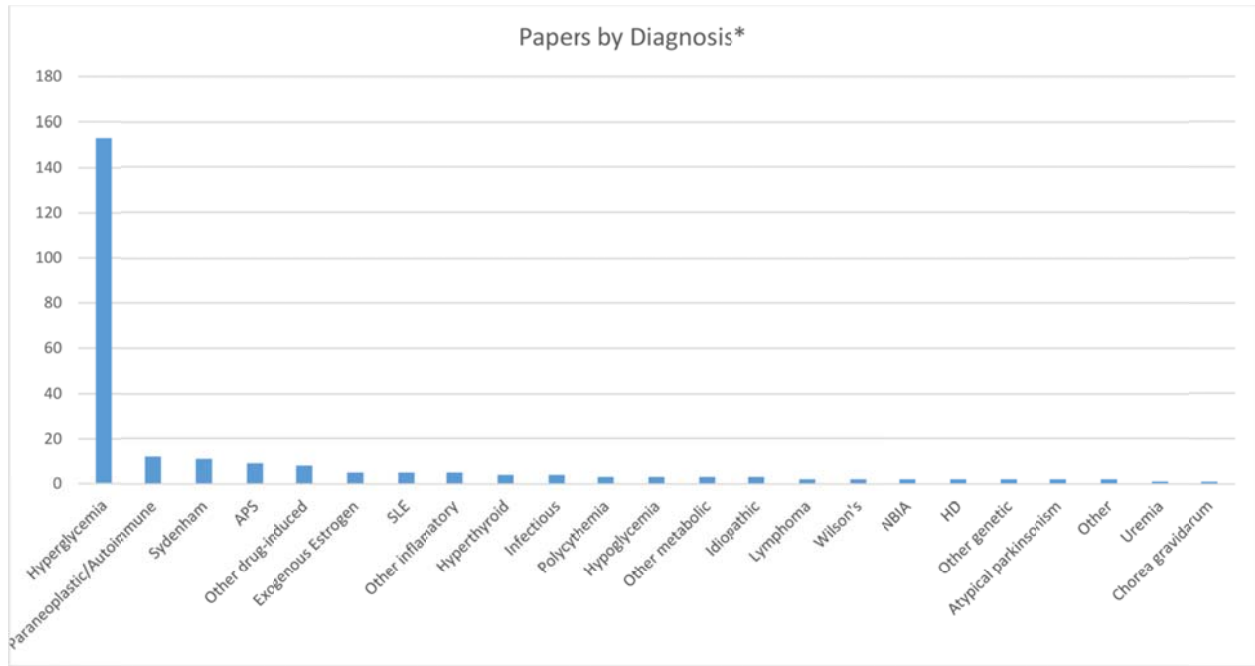

\* Papers including at least one asymmetric case included. Dual diagnosis categorized under both diagnoses.
