# Supplementary material for: One Side of the Story; Clues to Etiology in Patients with Asymmetric Chorea
Source: PubMed Central journal article supplement (PMC8815437; doi:10.5334/tohm.675), 2022-01-31

Supplemental Figure 3: Imaging findings in hyperglycemic hemichorea/hemibalismus.

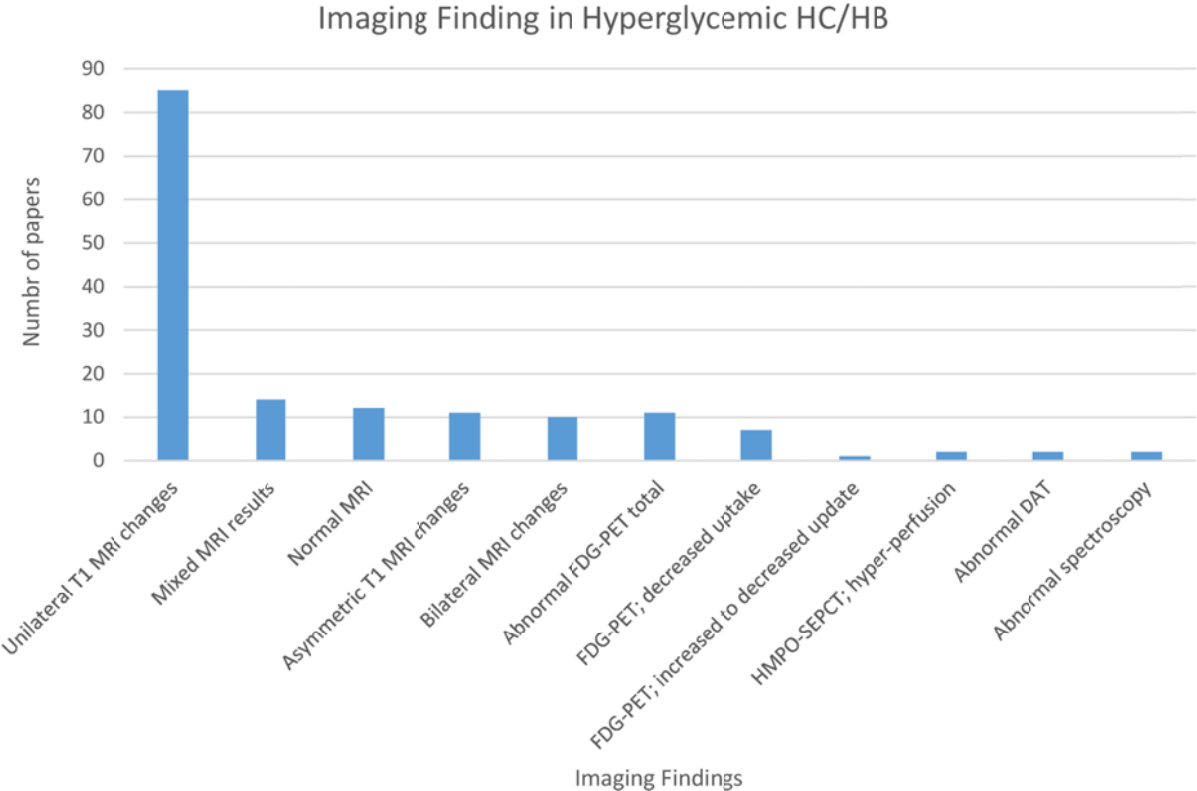

Supplement: tohm-12-1-675-s3.pdf [file tohm-12-1-675-s3.pdf]
